# Supplementary material for: Altered Expression of Zonula occludens-1 Affects Cardiac Na+ Channels and Increases Susceptibility to Ventricular Arrhythmias
Source: MDPI journal article supplement (doi:10.3390/cells11040665), 2022-02-14
Supplement: s1 [file s1]

## Supporting information

### Altered expression of Zonula occludens-1 affects cardiac Na<sup>+</sup> channels and increases susceptibility to ventricular arrhythmias

#### Authors

Mona El Refaey<sup>1,2 # \*</sup>, Sara Coles<sup>3 #</sup>, Hassan Musa<sup>1,4</sup>, Tyler L. Stevens<sup>1,4</sup>, Michael J. Wallace<sup>1,4</sup>, Nathaniel P. Murphy<sup>5</sup>, Steve Antwi-Boasiako<sup>1</sup>, Lindsay J. Young<sup>1</sup>, Heather Manring<sup>6</sup>, Jerry Curran<sup>1</sup>, Michael A. Makara<sup>1</sup>, Kelli Sas<sup>1</sup>, Mei Han<sup>1</sup>, Sara N. Koenig<sup>1,4</sup>, Michel Skaf<sup>1</sup>, Crystal F. Kline<sup>6</sup>, Paul ML Janssen<sup>1,4</sup>, Federica Accornero<sup>1,4</sup>, Maegen A. Borzok<sup>7</sup> and Peter J. Mohler<sup>1,4,8</sup>

#### Affiliations

<sup>1</sup> Frick Center for Heart Failure and Arrhythmia Research; The Dorothy M. Davis Heart and Lung Research Institute, The Ohio State University Wexner Medical Center, Columbus, OH, USA

<sup>2</sup> Department of Surgery, Division of Cardiac Surgery, The Ohio State University College of Medicine and Wexner Medical Center, Columbus, OH, USA

<sup>3</sup> Department of Medicine, Duke University School of Medicine, Durham, NC, USA

<sup>4</sup> Department of Physiology and Cell Biology, The Ohio State University College of Medicine and Wexner Medical Center, Columbus, OH, USA

<sup>5</sup> Department of Medicine, Northwestern Medicine, Chicago, IL, USA

<sup>6</sup> Comprehensive Cancer Center, The Ohio State University College of Medicine and Wexner Medical Center, Columbus, OH, USA

<sup>7</sup> Department of Natural Sciences, Mansfield University of Pennsylvania, Mansfield, PA, USA

<sup>8</sup> Department of Internal Medicine, Division of Cardiovascular Medicine, The Ohio State University College of Medicine and Wexner Medical Center, Columbus, OH, USA

# contributed equally

\* Correspondence: [Mona.elrefaey@osumc.edu](mailto:Mona.elrefaey@osumc.edu) ; Tel. 614-366-2748 (MER)

### **Supplemental Tables**

Supplemental Table 1 (Table S1)

Supplemental Table 2 (Table S2)

### **Supplemental Figures**

Supplemental Figure 1 (Figure S1)

Supplemental Figure 2 (Figure S2)

**Table S1. Summary of TEM findings in WT and ZO-1<sup>+/-</sup> ventricular myocytes**

|                                                                | <b>WT</b>   | <b>ZO-1<sup>+/-</sup></b> |
|----------------------------------------------------------------|-------------|---------------------------|
| <b>ID amplitude (mm)</b>                                       | 0.4 ± 0.03  | 0.3 ± 0.02*               |
| <b>AJ membrane distances (nm)</b>                              | 34.9 ± 1.0  | 33.3 ± 0.8                |
| <b>DJ membrane distances (nm)</b>                              | 31.9 ± 1.4  | 30.9 ± 1.1                |
| <b>GJ membrane distances (nm)</b>                              | 11.5 ± 0.8  | 14.6 ± 1.0*               |
| <b>Tread width (mm)</b>                                        | 1.8 ± 0.1   | 1.6 ± 0.2                 |
| <b>Step length (mm)</b>                                        | 1.7 ± 0.1   | 1.2 ± 0.1*                |
| <b>T-tubule axial diameter (mitochondrial-myofilament, nm)</b> | 168.4 ± 6.9 | 191.0 ± 9.0               |
| <b>T-tubule axial diameter (myofilament-myofilament, nm)</b>   | 64.3 ± 3.5  | 90.5 ± 4.9*               |
| <b>Fully extended SR (%)</b>                                   | 72.3 ± 3.0  | 69.6 ± 4.2                |
| <b>Partially extended SR (%)</b>                               | 24.6 ± 3.0  | 17.9 ± 3.7                |
| <b>Not extended SR (%)</b>                                     | 3.1 ± 1.4   | 12.5 ± 3.7*               |

n=3 (female mice) per genotype, \**p* < 0.05. ID: intercalated disc, SR: sarcoplasmic reticulum, AJ: adherens junctions, DJ: desmosome junctions, GJ: gap junctions

**Table S2. Summary of echocardiographic parameters in WT and ZO-1<sup>+/-</sup> mice.**

| Gender | Genotype            | IVSd (cm) | LVIDd (cm) | EDV (mL) | LVPWd (cm)  | IVSs (cm) | LVIDs (cm) | ESV (mL) | EF (%)   | FS (%)   | LVPWs (cm) |
|--------|---------------------|-----------|------------|----------|-------------|-----------|------------|----------|----------|----------|------------|
| Male   | WT                  | 0.06      | 0.41       | 0.17     | 0.08        | 0.08      | 0.32       | 0.08     | 52.28    | 22.73    | 0.09       |
| Male   | WT                  | 0.05      | 0.38       | 0.13     | 0.07        | 0.09      | 0.27       | 0.05     | 62.28    | 28.7     | 0.1        |
| Male   | WT                  | 0.05      | 0.375      | 0.135    | 0.04        | 0.06      | 0.295      | 0.065    | 50.205   | 21.58    | 0.06       |
| Male   | WT                  | 0.066667  | 0.3566667  | 0.116667 | 0.05        | 0.1       | 0.2433333  | 0.04     | 66.17    | 31.3233  | 0.07666667 |
| Female | WT                  | 0.05      | 0.43       | 0.19     | 0.07        | 0.08      | 0.29       | 0.06     | 66.04    | 31.35    | 0.09       |
| Female | WT                  | 0.05      | 0.36       | 0.12     | 0.06        | 0.08      | 0.25       | 0.04     | 65.06    | 30.52    | 0.09       |
| Female | WT                  | 0.0575    | 0.335      | 0.0975   | 0.0475      | 0.0625    | 0.2425     | 0.0375   | 62.8425  | 29.065   | 0.0725     |
|        | Average             | 0.054881  | 0.3780952  | 0.137024 | 0.059642857 | 0.078929  | 0.2729762  | 0.053214 | 60.69679 | 27.89548 | 0.0827381  |
| Female | ZO-1 <sup>+/-</sup> | 0.05      | 0.32       | 0.09     | 0.07        | 0.08      | 0.22       | 0.03     | 65.22    | 30.53    | 0.08       |
| Female | ZO-1 <sup>+/-</sup> | 0.056667  | 0.3066667  | 0.076667 | 0.073333333 | 0.06      | 0.2133333  | 0.023333 | 66.5     | 31.38667 | 0.11       |
| Male   | ZO-1 <sup>+/-</sup> | 0.066667  | 0.34       | 0.1      | 0.063333333 | 0.076667  | 0.25       | 0.043333 | 56.89667 | 25.33333 | 0.08333333 |
| Male   | ZO-1 <sup>+/-</sup> | 0.053333  | 0.3333333  | 0.096667 | 0.053333333 | 0.063333  | 0.2566667  | 0.043333 | 53.24667 | 23.20333 | 0.06666667 |
| Male   | ZO-1 <sup>+/-</sup> | 0.05      | 0.4        | 0.16     | 0.06        | 0.07      | 0.28       | 0.06     | 62.83    | 29.11    | 0.09       |
|        | Average             | 0.055333  | 0.34       | 0.104667 | 0.064       | 0.07      | 0.244      | 0.04     | 60.93867 | 27.91267 | 0.086      |
|        | p-values            | 0.9116    | 0.0843     | 0.1168   | 0.5581      | 0.2396    | 0.1174     | 0.168    | 0.8763   | 0.7551   | 0.7103     |

n=7 for WT and n=5 for ZO-1<sup>+/-</sup>. IVSd: Interventricular septal end diastole, LVIDd: Left ventricular internal diameter end diastole, EDV: End-diastolic volume, LVPWd: Left ventricular posterior wall end diastole, IVSs: Interventricular septal end systole, LVIDs: Left ventricular internal diameter end systole, ESV: End-systolic volume, EF: ejection fraction, FS: fractional shortening, LVPWs: Left ventricular posterior wall end systole.

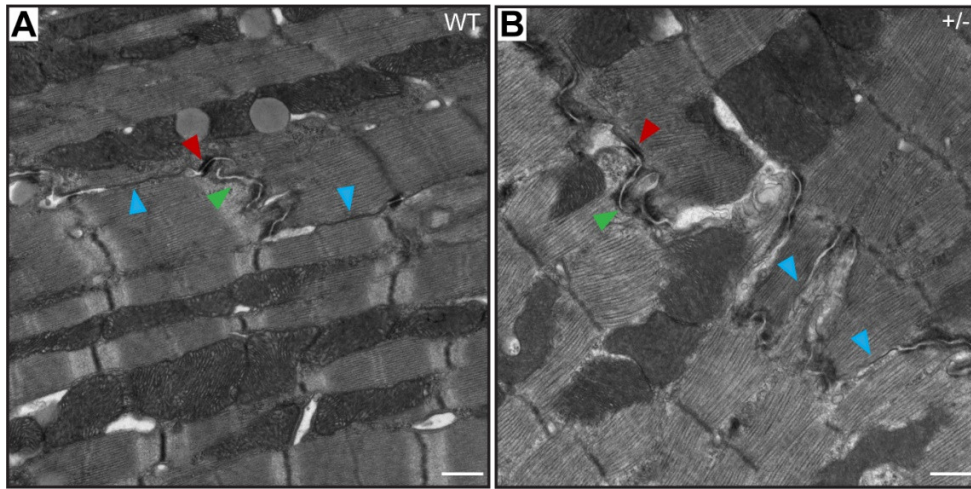

**Figure S1.** TEM images in WT and ZO-1<sup>+/-</sup> mice. TEM micrographs of intercalated disc between ventricular myocytes in WT (A) and ZO-1<sup>+/-</sup> (B) mice (n=3 (female mice) per genotype). Red arrows denote desmosome Junctions (DJ), green arrows for adherens junctions (AJ) and blue arrows for gap junctions (GJ). Scale bars equal 500 nm.

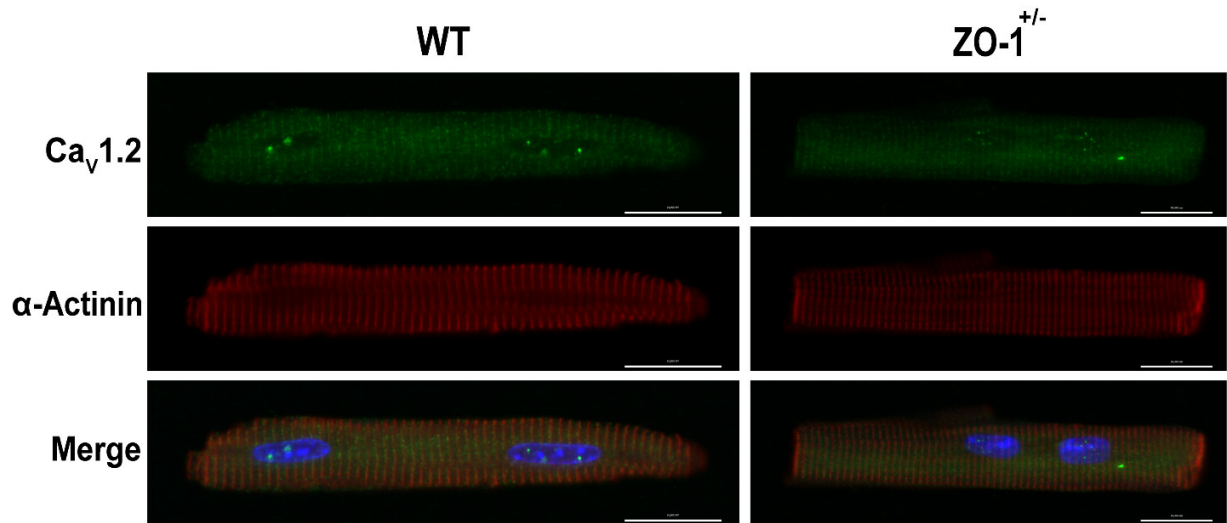

**Figure S2.** Ca<sub>v</sub>1.2 localization in WT and ZO-1 deficient ventricular myocytes. Localization of Ca<sub>v</sub>1.2 (green) and α-actinin (red) in WT and ZO-1<sup>+/-</sup> deficient myocytes. DAPI (blue) denotes nuclei. n=3/genotype (WT: 1 male and 2 female mice and ZO-1<sup>+/-</sup>: 2 male and 1 female mice). Scale bars equal 20 μm.
